# Supplementary material for: Temperature symmetry breaking and properties of lead-free organic–inorganic hybrids: bismuth(iii) iodide and antimony(iii) iodide: (S(CH3)3)3[Bi2I9] and (S(CH3)3)3[Sb2I9]
Source: Royal Society of Chemistry journal article supplement (doi:10.1039/d3dt01650a), 2023-01-01
Supplement: d3dt01650a2.pdf [file d3dt01650a2.pdf]

## Supplementary Material

### Temperature symmetry breaking and properties of lead-free organic-inorganic hybrids: antimony(III) iodide and bismuth(III) iodide: $[\text{S}(\text{CH}_3)_3]_3\text{Sb}_2\text{I}_9$ and $[\text{S}(\text{CH}_3)_3]_3\text{Bi}_2\text{I}_9$

Przemysław Szklarz<sup>\*a</sup>, Anna Gągor<sup>b</sup>, Ryszard Jakubas<sup>a</sup>, Wojciech Medycki<sup>c</sup>, and Grażyna Bator<sup>a</sup>

a) Faculty of Chemistry, University of Wrocław, F. Joliot-Curie 14, 50-383 Wrocław, Poland. E-mail: przemyslaw.szklarz@chem.uni.wroc.pl

b) W. Trzebiatowski Institute of Low Temperature and Structure Research Polish Academy of Science, P.O. Box 1410, 50-950 Wrocław, Poland.

c) Institute of Molecular Physics, Polish Academy of Sciences, Smoluchowskiego 17, 60-179 Poznań, Poland

**Table S1.** Experimental details of x-ray measurements.

|                                                                         | PHASE I                                | PHASE II                                                | PHASE III                                |
|-------------------------------------------------------------------------|----------------------------------------|---------------------------------------------------------|------------------------------------------|
| <b>Crystal data</b>                                                     |                                        |                                                         |                                          |
| Chemical formula                                                        |                                        | $[\text{C}_3\text{H}_9\text{S}]_3\text{Bi}_2\text{I}_9$ |                                          |
| $M_r$                                                                   | 1764.33                                | 1791.54                                                 | 1791.54                                  |
| Crystal system, space group                                             | Hexagonal, $P6_3/mmc$                  | Monoclinic, $C2/c$                                      | Triclinic, $P-1$                         |
| Temperature (K)                                                         | 325                                    | 200                                                     | 100                                      |
| $a, b, c$ (Å)                                                           | 9.759 (1),<br>9.759 (1),<br>23.153 (3) | 19.005 (1),<br>33.199 (1),<br>22.897 (1)                | 18.854 (1),<br>18.993 (1),<br>22.686 (1) |
| $\alpha, \beta, \gamma$ (°)                                             | 90, 90, 120                            | 90, 91.88 (1), 90                                       | 89.06 (1), 88.08 (1), 60.27 (1)          |
| $V$ (Å <sup>3</sup> ), $Z$                                              | 1909.8 (5), 2                          | 14439.3 (6), 16                                         | 7050.5 (3), 8                            |
| $\mu$ (mm <sup>-1</sup> )                                               | 16.64                                  | 17.61                                                   | 18.03                                    |
| <b>Data collection</b>                                                  |                                        |                                                         |                                          |
| No. of measured, independent and observed [ $I > 2\sigma(I)$ ] ref.     | 5576, 981, 294                         | 56080, 17382, 12160                                     | 54603, 32278, 22968                      |
| $R_{\text{int}}$                                                        | 0.079                                  | 0.056                                                   | 0.063                                    |
| <b>Refinement</b>                                                       |                                        |                                                         |                                          |
| $R[F^2 > 2\sigma(F^2)]$ , $wR(F^2)$ , $S$                               | 0.088, 0.375, 0.98                     | 0.048, 0.109, 1.22                                      | 0.102, 0.229, 1.17                       |
| No. of reflections                                                      | 981                                    | 17382                                                   | 32278                                    |
| No. of parameters                                                       | 14                                     | 427                                                     | 599                                      |
| No. of restraints                                                       | 3                                      | 0                                                       | 0                                        |
| H-atom treatment                                                        | –                                      | H-atom parameters constrained                           | H-atom parameters constrained            |
| $\Delta\rho_{\text{max}}, \Delta\rho_{\text{min}}$ (e Å <sup>-3</sup> ) | 1.41, -1.09                            | 1.9, -1.4                                               | 5.9, -4.1                                |

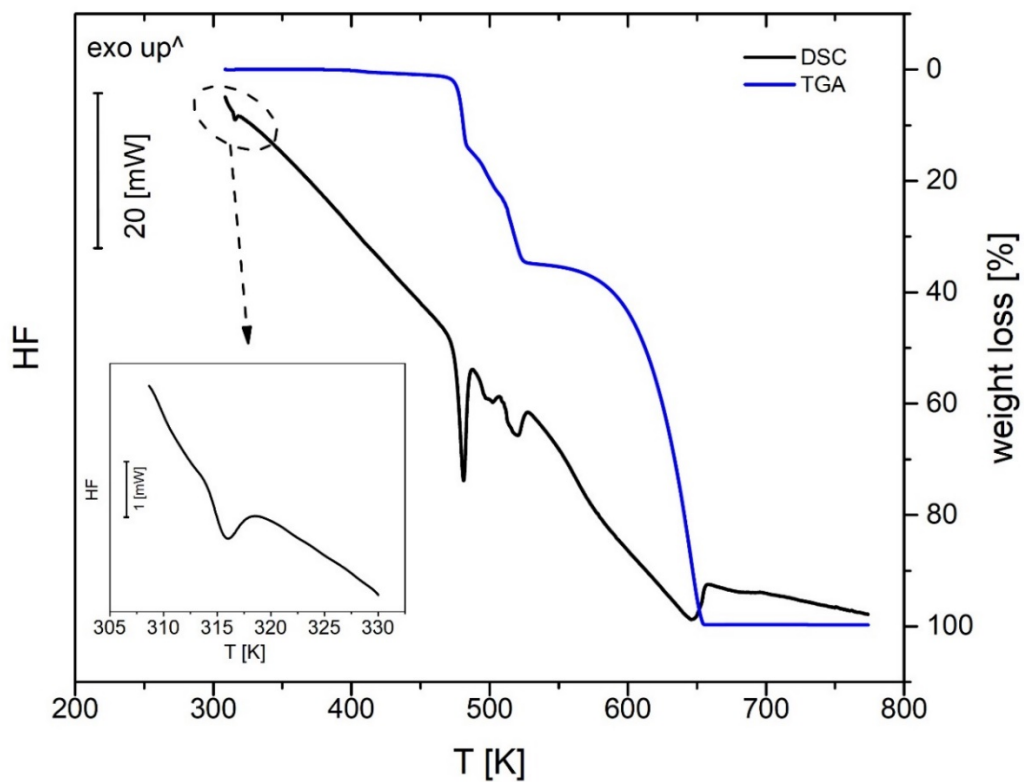

**Fig. S1.** The TGA and DSC signals for **TBI** ( $m_s=16.3794$  mg).

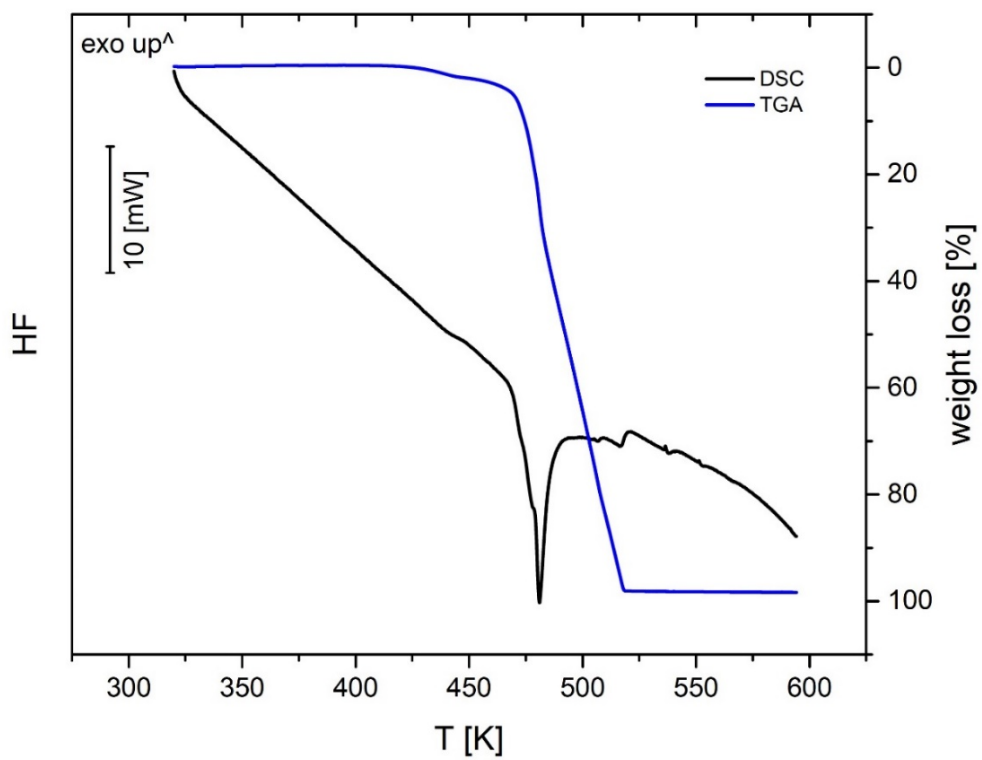

**Fig. S2.** The TGA and DSC signals for **TSI** ( $m_s=10.1380$  mg).

**Table. S2.** Thermodynamic parameters of the phase transitions for **TBI** and **TSI** in the solid state.

| Parameters                                                          | <b>TBI</b>    | <b>TSI</b>    |
|---------------------------------------------------------------------|---------------|---------------|
| M [g·mol <sup>-1</sup> ]                                            | 1791.61       | 1617.17       |
| T <sub>onset</sub> [K] (coling/heating)                             |               |               |
| I→II                                                                | 314.2/314.8   | 303.9/304.1   |
| II→III                                                              | -/181.5       | 212.9/221.4   |
| $\Delta H_{PT}$ [J mol <sup>-1</sup> ] (coling/heating)             |               |               |
| I→II                                                                | 7542.7/7811.4 | 6533.4/6484.8 |
| II→III                                                              | -/2884.5      | 4641.3/4770.6 |
| $\Delta S$ [J·mol <sup>-1</sup> ·K <sup>-1</sup> ] (coling/heating) |               |               |
| I→II                                                                | 24.0/24.9     | 21.5/21.3     |
| II→III                                                              | -/15.9        | 21.8/21.6     |

**Table. S3 .** Activation energies, correlation times and motional constants evaluated for **TBI** and for **TSI**.

|            | Temperatur<br>e<br>range | E <sub>a</sub> [kJ/mol] | $\tau_0$ [S]           | C [s <sup>-2</sup> ]  |
|------------|--------------------------|-------------------------|------------------------|-----------------------|
| <b>TBI</b> | < 183K                   | 6.8                     | 1.92 10 <sup>-12</sup> | 3.83 10 <sup>9</sup>  |
|            | 183K-313K                | 26.8                    | 4.03 10 <sup>-15</sup> | 1.8 10 <sup>9</sup>   |
|            | 313K <                   | 8.4                     |                        |                       |
| <b>TSI</b> | <223K                    | 6.53                    | 2.33 10 <sup>-12</sup> | 4.38 10 <sup>9</sup>  |
|            | 223K-293K                | 27.1                    | 3.94 10 <sup>-15</sup> | 1.698 10 <sup>9</sup> |
|            | 293K <                   | 11.5                    |                        |                       |
