# Supplementary figures and images for: Temperature symmetry breaking and properties of lead-free organic–inorganic hybrids: bismuth(iii) iodide and antimony(iii) iodide: (S(CH3)3)3[Bi2I9] and (S(CH3)3)3[Sb2I9]
Source: Royal Society of Chemistry journal article supplement (doi:10.1039/d3dt01650a), 2023-01-01

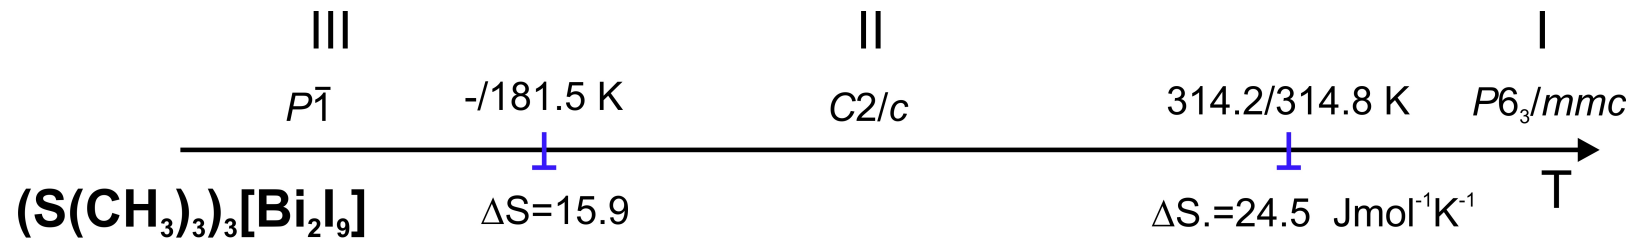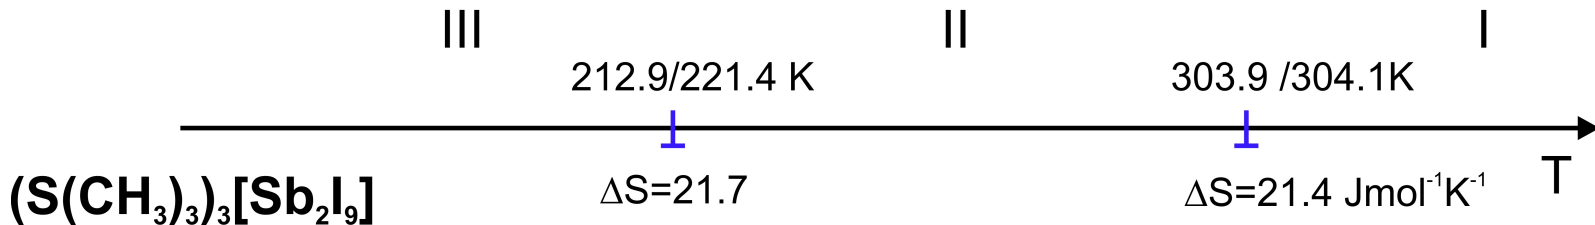

Supplement: d3dt01650a1.pdf [file d3dt01650a1.pdf]
